# Supplementary material for: Climate change and uncertainty in high-resolution rainfall extremes
Source: Copernicus journal article supplement (doi:10.5194/hess-2016-536), 2016-10-17

# Climate change and uncertainty in high-resolution rainfall extremes

Bahareh Kianfar<sup>1</sup>, Simone Fatichi<sup>1</sup>, Athanasios Paschalis<sup>2</sup>, Max Maurer<sup>1,3</sup>, and Peter Molnar<sup>1</sup>

<sup>1</sup> Institute of Environmental Engineering, ETH Zurich, Zurich, Switzerland

<sup>2</sup> Faculty of Engineering and the Environment, University of Southampton, Southampton, UK

<sup>3</sup> Eawag, Swiss Federal Institute of Aquatic Science and Technology, Duebendorf, Switzerland

## Supplementary Materials

**Figure 3 for Basel, Geneva, Waedenswil**

Caption is identical to the manuscript and is not repeated here.

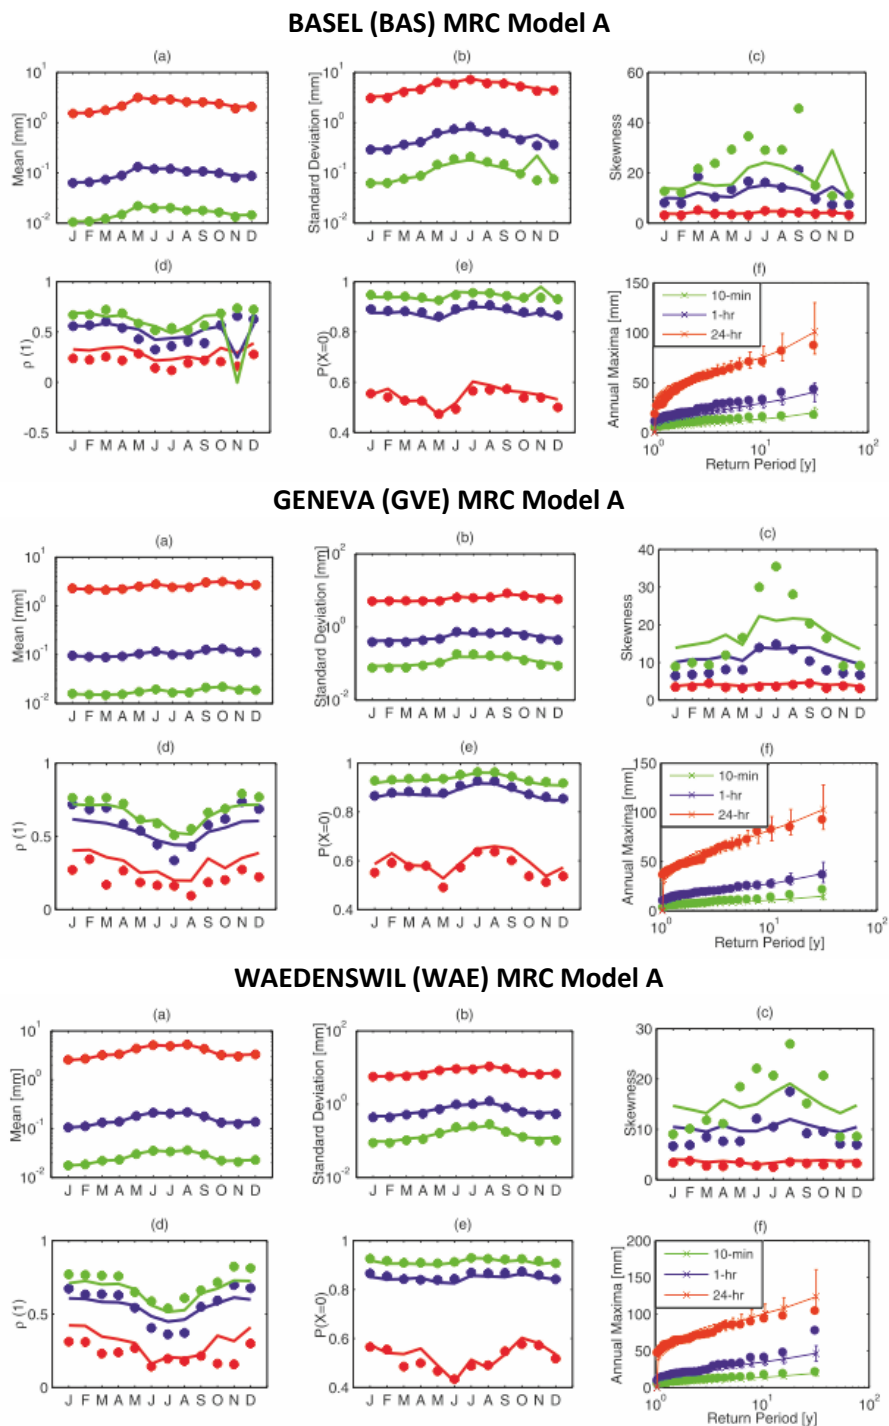

**Figure 4 for Basel, Geneva, Waedenswil**  
 Caption is identical to the manuscript and is not repeated here.

**BASEL (BAS) MRC Model B**

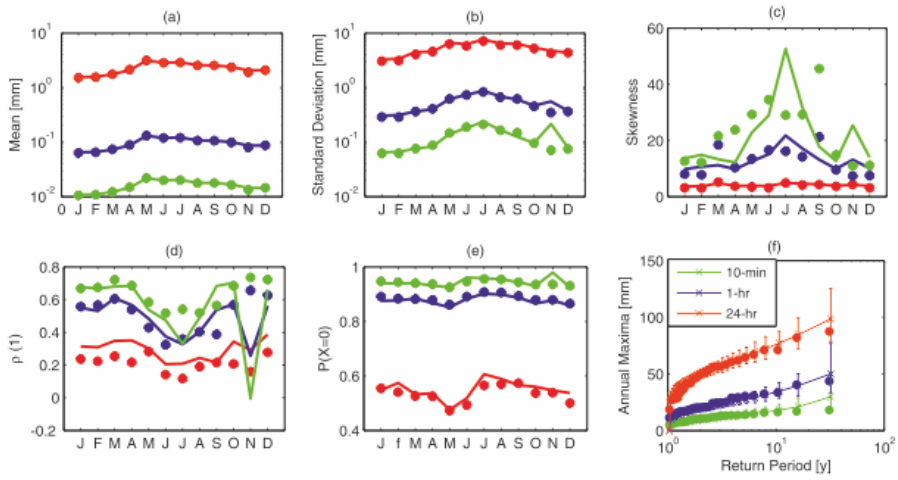

**GENEVA (GVE) MRC Model B**

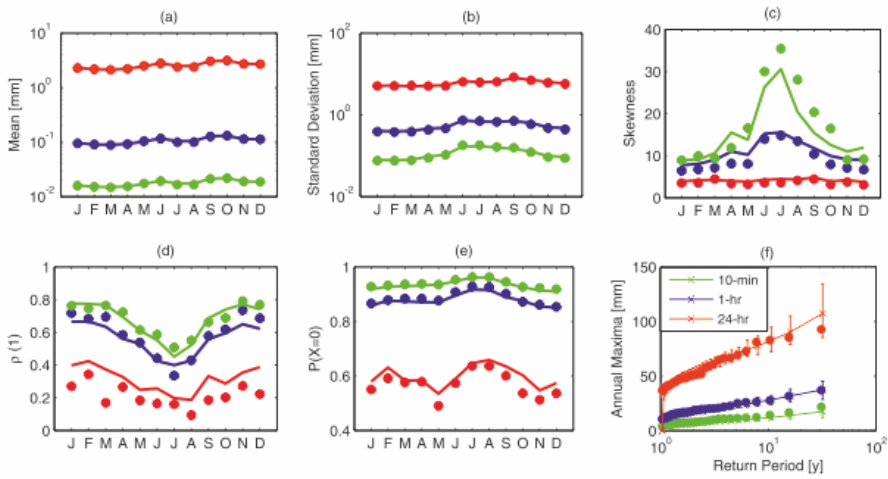

**WAEDENSWIL (WAE) MRC Model B**

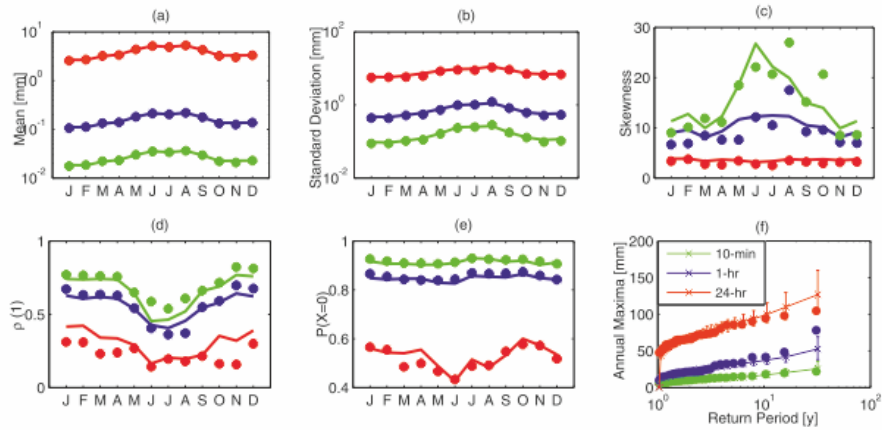

**Figure 6 for Basel, Geneva, Waedenswil**  
Caption is identical to the manuscript and is not repeated here.

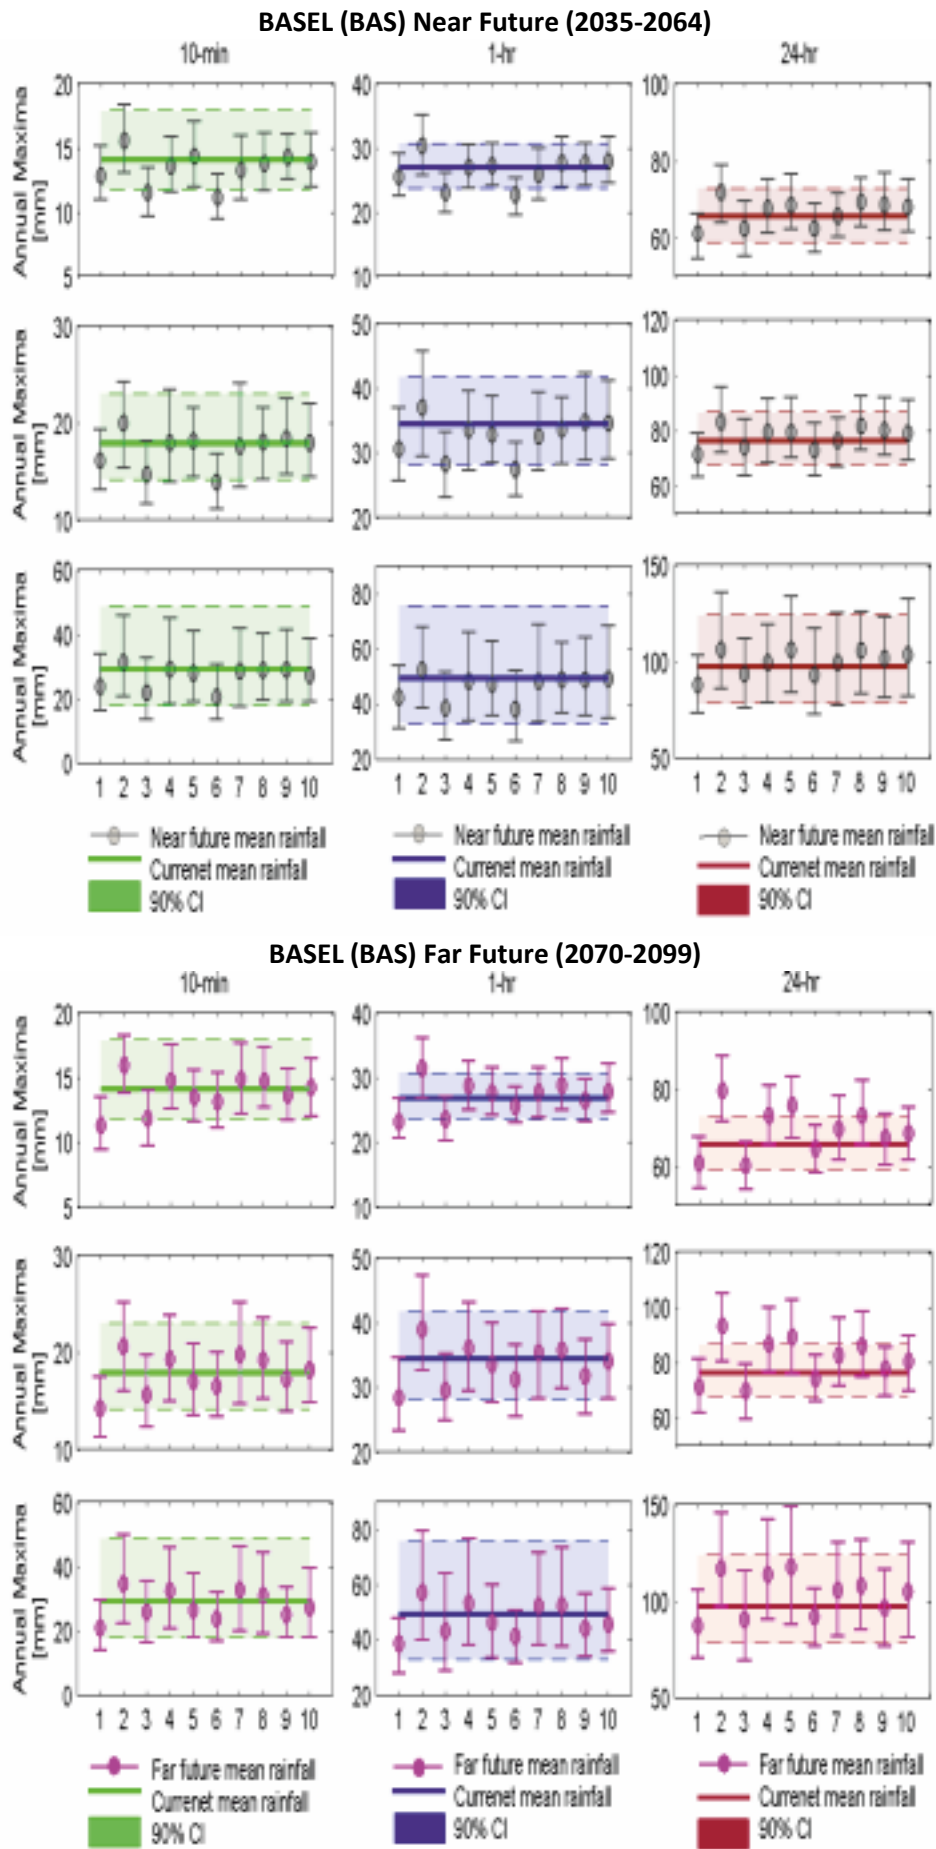

**GENEVA (GVE) Near Future (2035-2064)**

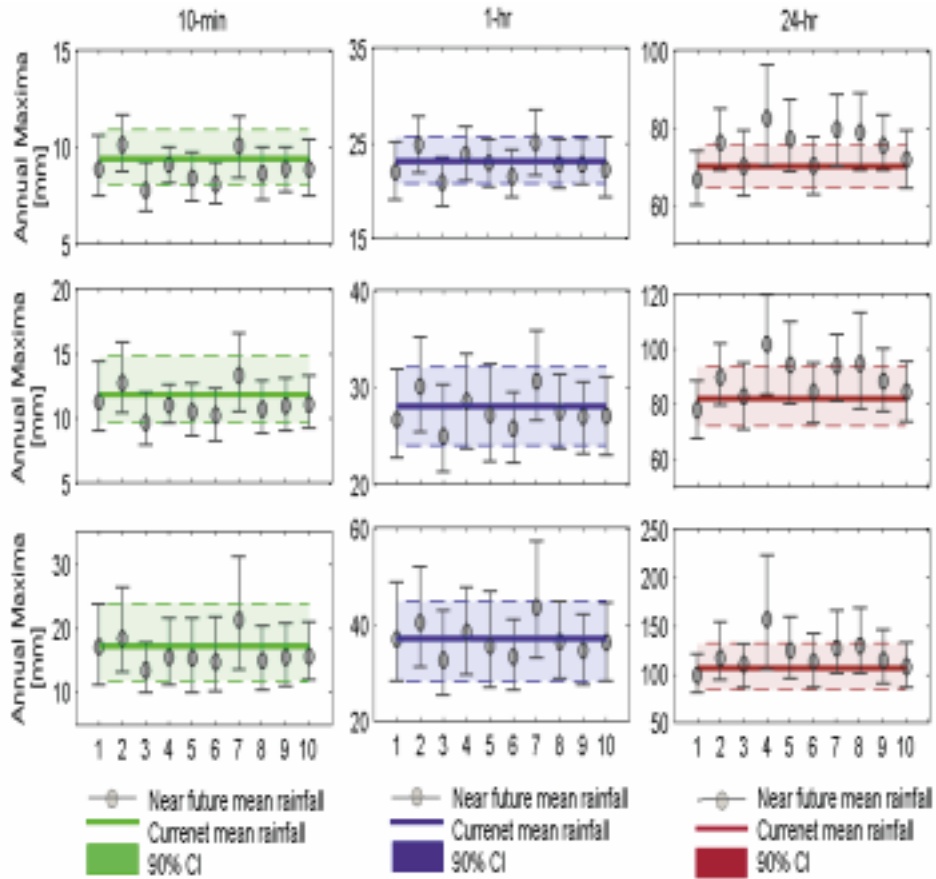

**GENEVA (GVE) Far Future (2070-2099)**

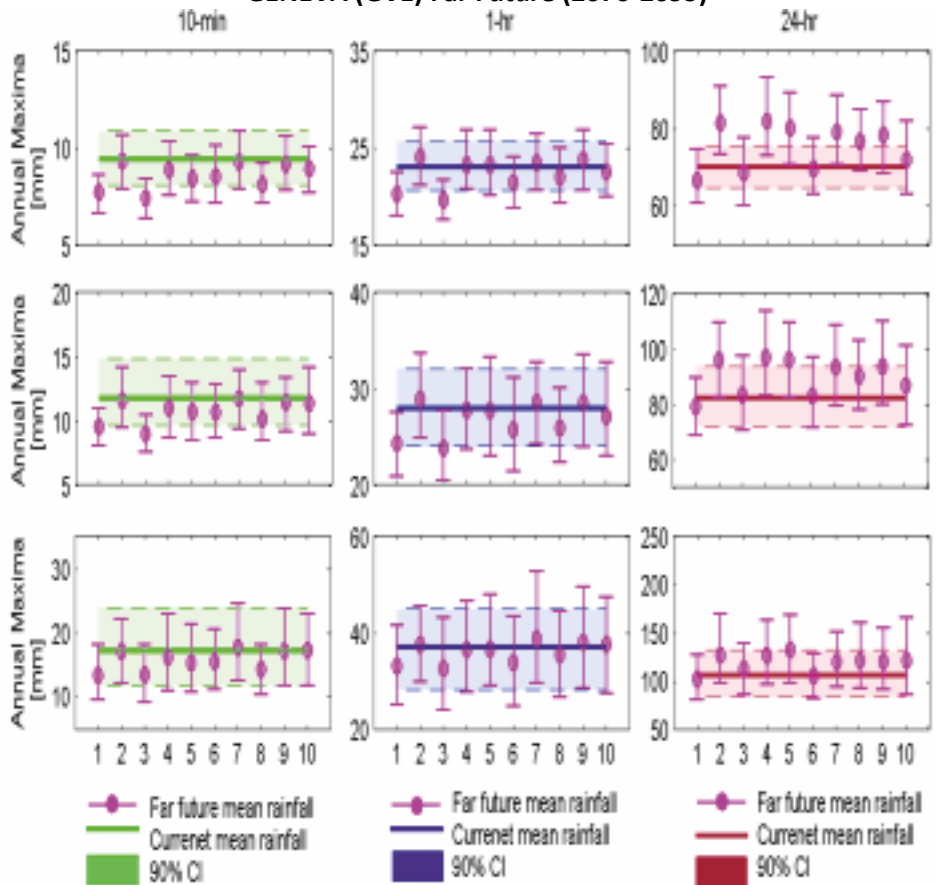

**WAEDENSWIL (WAE) Near Future (2035-2064)**

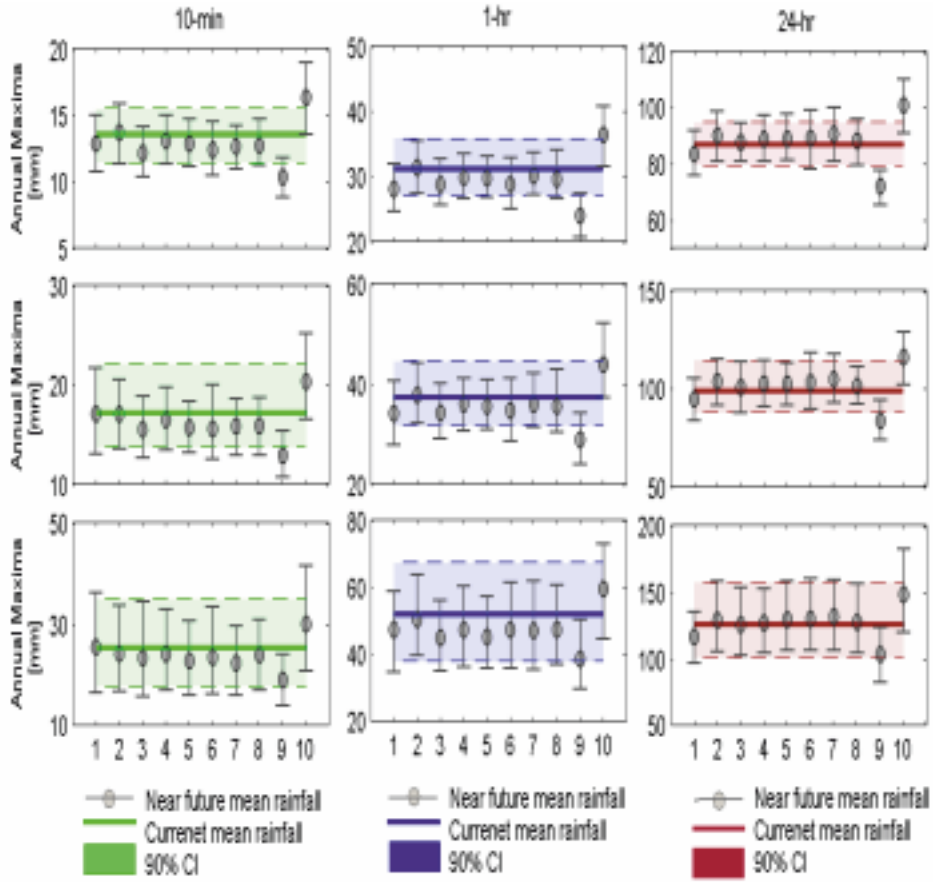

**WAEDENSWIL (WAE) Far Future (2070-2099)**

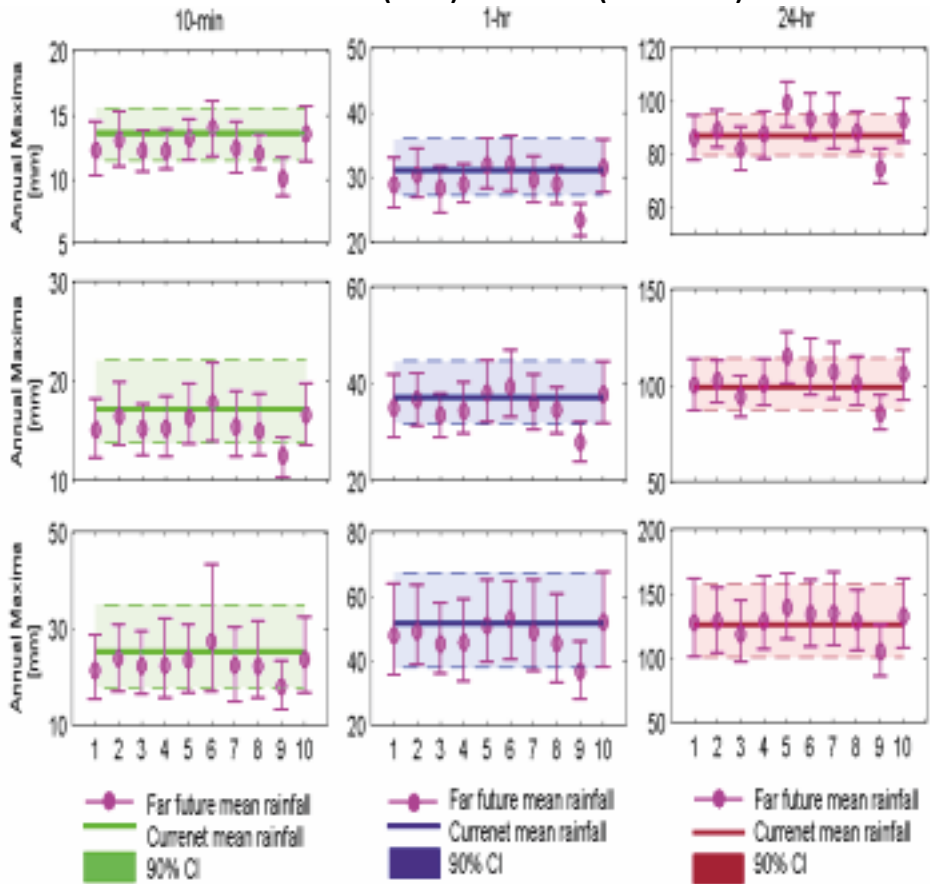

Supplement: Supplementary file 1 [file hess-2016-536-supplement.pdf]
